# Supplementary material
Source: MDPI journal article supplement (https://www.mdpi.com/2075-4442/12/2/58)
Supplement: s1 [file s1]

# Synergistic Effects of Functionalized WS<sub>2</sub> and SiO<sub>2</sub> Nanoparticles and a Phosphonium Ionic Liquid as Hybrid Additives of Low-Viscosity Lubricants

José M. Liñeira del Río <sup>1,2,\*</sup>, Carlos M. C. G. Fernandes <sup>2,3</sup>, David E. P. Gonçalves <sup>2</sup> and Jorge H. O. Seabra <sup>3</sup>

<sup>1</sup> Laboratory of Thermophysical and Tribological Properties, Nafomat Group, Department of Applied Physics, Faculty of Physics, and Institute of Materials (iMATUS), Universidade de Santiago de Compostela, 15782 Santiago de Compostela, Spain

<sup>2</sup> Unidade de Tribologia, Vibrações e Manutenção Industrial, INEGI, Universidade do Porto, 4200-465 Porto, Portugal; cfernandes@fe.up.pt (C.M.C.G.F.); degoncalves@inegi.up.pt (D.E.P.G.)

<sup>3</sup> Faculdade de Engenharia, Universidade do Porto, Rua Dr. Roberto Frias s/n, 4200-465 Porto, Portugal; jseabra@inegi.up.pt

\* Correspondence: josemanuel.lineira@usc.es

**Table S1.** Dynamic viscosities of PAO6 based nanolubricants and PAO6 base oil.

|        | PAO6      | 0.1 wt% f-WS2<br>+ 1 wt% IL | 0.1 wt% f-SiO <sub>2</sub> +<br>1 wt% IL | 0.1 wt% f-WS2 + 0.1<br>wt% f-SiO <sub>2</sub> + 1 wt% IL |
|--------|-----------|-----------------------------|------------------------------------------|----------------------------------------------------------|
| T / K  | η / mPa.s | η / mPa.s                   | η / mPa.s                                | η / mPa.s                                                |
| 298.15 | 137.92    | 150.32                      | 151.07                                   | 151.48                                                   |
| 303.15 | 102.84    | 112.36                      | 113.19                                   | 113.22                                                   |
| 308.15 | 78.146    | 84.328                      | 86.152                                   | 86.291                                                   |
| 313.15 | 60.358    | 65.911                      | 66.498                                   | 66.762                                                   |
| 318.15 | 47.546    | 51.861                      | 52.534                                   | 52.684                                                   |
| 323.15 | 37.704    | 40.567                      | 41.872                                   | 41.823                                                   |
| 328.15 | 30.404    | 31.823                      | 32.924                                   | 33.945                                                   |
| 333.15 | 24.843    | 25.938                      | 27.071                                   | 27.736                                                   |
| 338.15 | 20.539    | 21.784                      | 22.319                                   | 22.927                                                   |
| 343.15 | 17.168    | 18.126                      | 19.256                                   | 19.259                                                   |
| 348.15 | 14.495    | 15.127                      | 16.468                                   | 16.527                                                   |
| 353.15 | 12.359    | 12.874                      | 13.828                                   | 13.887                                                   |
| 358.15 | 10.625    | 11.024                      | 11.919                                   | 11.962                                                   |
| 363.15 | 9.2073    | 9.7895                      | 10.412                                   | 10.487                                                   |
| 368.15 | 8.0403    | 8.6448                      | 9.1473                                   | 9.1515                                                   |
| 373.15 | 7.07      | 7.7621                      | 7.9894                                   | 8.0434                                                   |
| 378.15 | 6.2617    | 6.6721                      | 7.0812                                   | 7.0842                                                   |
| 383.15 | 5.5817    | 6.0132                      | 6.3732                                   | 6.4003                                                   |
| 388.15 | 5.0078    | 5.4232                      | 5.6852                                   | 5.6989                                                   |
| 393.15 | 4.5212    | 4.9332                      | 5.1216                                   | 5.1361                                                   |
